# Supplementary material for: Diagnostic Value of the Vestibular Autorotation Test in Menière’s Disease, Vestibular Migraine and Menière’s Disease with Migraine
Source: MDPI journal article supplement (doi:10.3390/brainsci12111432), 2022-10-25
Supplement: s1 [file s1]

## Supplementary Materials:

**Table S1. Characteristics of VAT parameters in MD and VM patients.**

| Parameter        | classification | MD ( <i>n</i> = 69) | VM ( <i>n</i> = 79) | <i>p</i> -value |
|------------------|----------------|---------------------|---------------------|-----------------|
|                  |                | <i>n</i> (%)        | <i>n</i> (%)        |                 |
| Horizontal gain  | decrease       | 21 (30.4)           | 5 (6.3)             | <0.001***       |
|                  | normal         | 45 (65.2)           | 34 (43.0)           | 0.01*           |
|                  | increase       | 3 (4.3)             | 40 (50.6)           | <0.001***       |
| Horizontal phase | decrease       | 6 (8.7)             | 3 (3.8)             | 0.21            |
|                  | normal         | 30 (43.5)           | 28 (35.4)           | 0.32            |
|                  | increase       | 33 (47.8)           | 48 (60.8)           | 0.12            |
| Vertical gain    | decrease       | 6 (8.7)             | 4 (5.1)             | 0.58            |
|                  | normal         | 60 (87.0)           | 73 (92.4)           | 0.27            |
|                  | increase       | 3 (4.3)             | 2 (2.5)             | 0.54            |
| Vertical phase   | decrease       | 6 (8.7)             | 4 (5.1)             | 0.58            |
|                  | normal         | 60 (87.0)           | 73 (92.4)           | 0.27            |
|                  | increase       | 3 (4.3)             | 2 (2.5)             | 0.54            |
| Asymmetry        | normal         | 51 (73.9)           | 63 (79.7)           | 0.40            |
|                  | abnormal       | 18 (26.1)           | 16 (20.3)           | 0.40            |

**Note:** \**p* < 0.05, \*\**p* < 0.01, \*\*\**p* < 0.001 **Abbreviations:** MD: Meniere's disease; VM: vestibular Migraine; VAT: vestibular autorotation test

**Table S2. Identification of different parameters of VAT in VM and MD patients by multivariate binary logistic regression analysis.**

| Parameter        | Classification | OR   | 95% CI     | <i>p</i> -value |
|------------------|----------------|------|------------|-----------------|
| Horizontal gain  | decrease       | 1.00 | -          | <0.001***       |
|                  | normal         | 0.28 | 0.09~0.87  | 0.03*           |
|                  | increase       | 0.01 | 0.00~0.07  | <0.001***       |
| Horizontal phase | decrease       | 1.00 | -          | 0.99            |
|                  | normal         | 0.96 | 0.15~6.32  | 0.97            |
|                  | increase       | 1.03 | 0.16~6.45  | 0.98            |
| Vertical gain    | decrease       | 1.00 | -          | 0.10            |
|                  | normal         | 0.19 | 0.03~1.17  | 0.07            |
|                  | increase       | 0.99 | 0.05~19.49 | 0.99            |
| Vertical phase   | decrease       | 1.00 | -          | 0.10            |
|                  | normal         | 0.19 | 0.03~1.17  | 0.07            |
|                  | increase       | 0.99 | 0.05~19.49 | 0.99            |
| Asymmetry        | normal         | 1.00 | -          | 1.00            |
|                  | abnormal       | 1.08 | 0.39~2.99  | 0.88            |

**Note:** \* $p < 0.05$ , \*\* $p < 0.01$ , \*\*\* $p < 0.001$  **Abbreviations:** MD, Meniere's disease; VM, vestibular migraine; OR, odds ratio; CI, confidence interval; VAT: vestibular autorotation test

**Table S3. Cutoff value of different parameters of VAT by multivariate binary logistic regression analysis.**

| Test Result Variable(s) | Positive if Greater Than or Equal To <sup>a</sup> | Sensitivity | 1 - Specificity |
|-------------------------|---------------------------------------------------|-------------|-----------------|
| Horizontal gain         | 0.00                                              | 1.00        | 1.00            |
|                         | 0.32                                              | 0.96        | 0.49            |
|                         | 0.69                                              | 0.30        | 0.06            |
|                         | 1.00                                              | 0.00        | 0.00            |
| Horizontal phase        | 0.00                                              | 1.00        | 1.00            |
|                         | 0.46                                              | 0.52        | 0.39            |
|                         | 0.59                                              | 0.09        | 0.04            |
|                         | 1.00                                              | 0.00        | 0.00            |
| Vertical gain           | 0.00                                              | 1.00        | 1.00            |
|                         | 0.53                                              | 0.13        | 0.08            |
|                         | 0.60                                              | 0.09        | 0.05            |
|                         | 1.00                                              | 0.00        | 0.00            |
| Vertical phase          | 0.00                                              | 1.00        | 1.00            |
|                         | 0.53                                              | 0.13        | 0.08            |
|                         | 0.60                                              | 0.09        | 0.05            |
|                         | 1.00                                              | 0.00        | 0.00            |
| Asymmetry               | 0.00                                              | 1.00        | 1.00            |
|                         | 0.49                                              | 0.26        | 0.20            |
|                         | 1.00                                              | 0.00        | 0.00            |

**Note:**

The test result variable(s): Horizontal gain, Horizontal phase, Vertical gain, Vertical phase, Asymmetry has at least one tie between the positive actual state group and the negative actual state group.

- a. The smallest cutoff value is the minimum observed test value minus 1, and the largest cutoff value is the maximum observed test value plus 1. All the other cutoff values are the averages of two consecutive ordered observed test values.

**Table S4. VAT testing method.**

|                |                                                                                                                                                                                                                                                                                                                                                       |                                                                                                                                                                   |
|----------------|-------------------------------------------------------------------------------------------------------------------------------------------------------------------------------------------------------------------------------------------------------------------------------------------------------------------------------------------------------|-------------------------------------------------------------------------------------------------------------------------------------------------------------------|
| Test principle | Subjects were asked to perform active head movements over a rising frequency, ranging from 2.0 to 6.0 Hz, which can detect a closer-to-real state of the vestibular function, and they were instructed to perform head rotations on horizontal and vertical planes. An algorithm was used for spectrum analysis to obtain gain, phase, and asymmetry. |                                                                                                                                                                   |
| Patients       | During the test, the patient was required to fix the eyes on a target and move the head simultaneously in response to the beeps of the computer speaker (beeps frequency from slow to fast: 0.5 Hz → 6 Hz, amplitude of head movement: 20° → 5° ). The test was performed three times on horizontal and vertical planes.                              |                                                                                                                                                                   |
| Parameter      | Description                                                                                                                                                                                                                                                                                                                                           | Calculation formula                                                                                                                                               |
| Gain           | The ratio of eye to head speed                                                                                                                                                                                                                                                                                                                        | $\text{Gain} = \text{PSD (Eye velocity)} / \text{PSD (Head velocity)}$                                                                                            |
| Phase          | The time when eye movement lags behind head movement                                                                                                                                                                                                                                                                                                  | $\text{Phase} = \text{PSD}(t) / \text{PSD}(T) \times 360^\circ$                                                                                                   |
| Asymmetry      | Symmetry of left and right eye velocity                                                                                                                                                                                                                                                                                                               | $\text{Asymmetry (\%)} = 100\% [(\text{PSD right eye velocity} - \text{PSD left eye velocity}) / (\text{PSD right eye velocity} + \text{PSD left eye velocity})]$ |

**Notes:** t: The interval time between the eye peak and the head peak in the same direction as before, T: Time between two adjacent head peaks. PSD (Power Spectral Density): An algorithm for spectrum analysis, which used the Fast Fourier Transformation (FFT) of time-domain signals such as “Eye speed” and “Head speed”, was used to generate the desired amplitude information at different frequencies using a PSD algorithm.

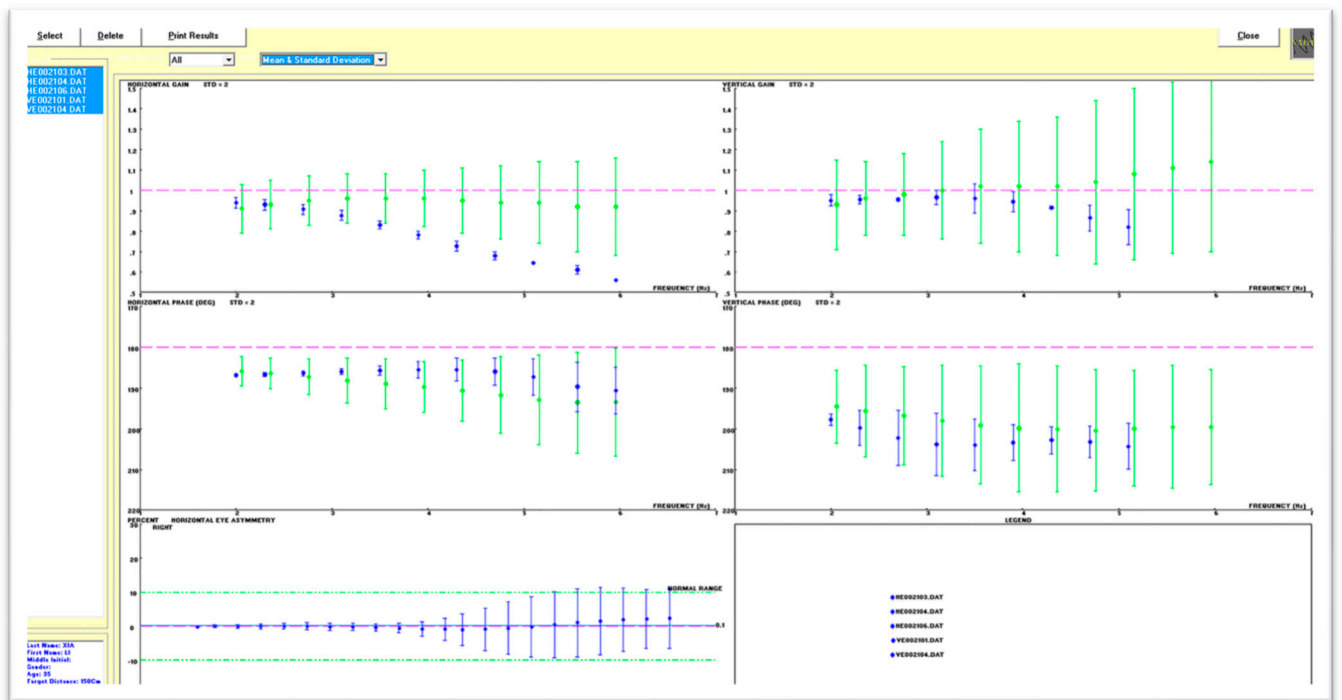

**Figure S1.** VAT result from a patient with MD (Meniere's disease). A decreased horizontal gain can be noted. a): Horizontal gain; b: Vertical gain; c: Horizontal phase; d: Vertical phase; e: Asymmetry

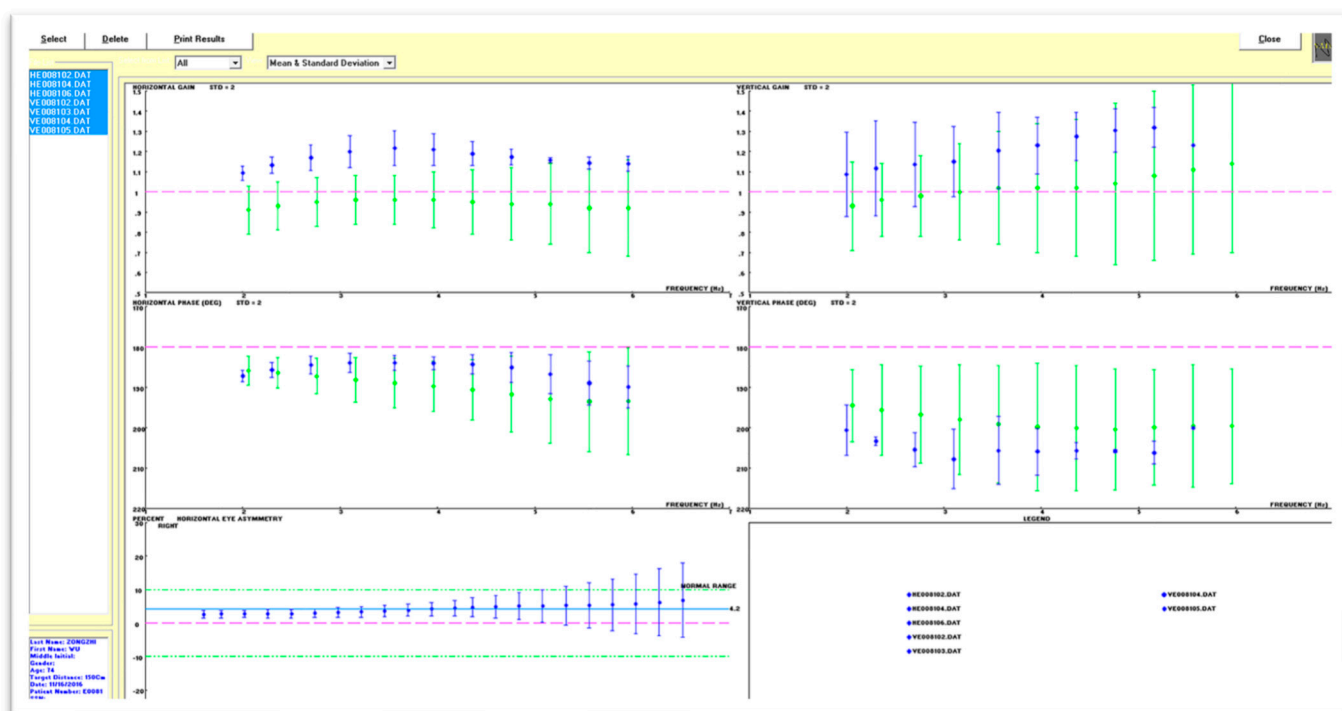

**Figure. S2** VAT result from a patient with VM (vestibular migraine). An increased horizontal gain can be noted. a): Horizontal gain; b: Vertical gain; c: Horizontal phase; d: Vertical phase; e: Asymmetry
